# Supplementary material
Source: bioRxiv or medRxiv preprint supplement (https://www.biorxiv.org/highwire/filestream/99970/field_highwire_adjunct_files/0/327015-1.pdf)
Supplement: Supplementary file [file 327015-1.pdf]

## **Supplementary Methods, Results, Figures, Tables and References for Hernandez *et al.***

### **Detecting emerging bacterial pathogens**

#### Sample collection and processing

Eight sampling sites on the Fal estuary and English Channel coast near Falmouth (Cornwall, United Kingdom) were selected for water and sediment sampling. Four sites were estuarine (Mylor, Flushing, Penryn and Falmouth Harbour) and four truly coastal (Castle Beach, Gyllyngvase Beach, Swanpool Beach, and Maenporth Beach) (Figure S1). Samples from each site were collected on 21 June 2017 and 6 July 2017. Each sampling effort consisted of collecting water (2\*50 mL) and upper 1cm layer of sediment (~25 g) from all eight sites within a time span of two hours around low-tide. Samples were collected using sterile 50mL centrifuge tubes. All samples were kept on ice during transport and processed in laboratory within an hour from collection.

Each water sample was centrifuged at 500 rpm at 4°C for 15 minutes (2 x 50 mL) to pellet sediment particles. The supernatants were then transferred to new sterile 50mL centrifuge tubes and spun down at 3500 rpm at 4°C for 30 minutes to pellet bacteria. The supernatant was discarded and the pellet in each tube resuspended in 500µL of sterile M9 buffer. Resuspensions from the two tubes per sample were then combined in a 1.5 mL Eppendorf tube to obtain a total concentrated water sample of 1mL. Bacteria were extracted from sediments by adding 10g of sediment with 10mL of sterile M9 buffer. Samples were vortexed at 3000 rpm for 2 minutes, and then centrifuged at 500 rpm at 4°C for 15 minutes to pellet sediment particles. The supernatant was then centrifuged as above and resuspended in 1mL of M9 buffer. All samples were kept at 4°C or on ice at all times.

#### Flow cytometry

Concentrated water and sediment wash samples were analysed for bacterial load with the use of flow cytometry. For each sample (200 µL sample + 20 µL 2.5x SybrGold), 10 µL was analyzed for number of events using low flow rate (14 µL /min) in a BD Accuri C6 Plus flow cytometer (BD

Biosciences, San Jose, CA). The BD Accuri C6 Plus is equipped with a blue and red laser, two light scatter detectors, and four fluorescence detectors. Bacteria cells were distinguished from non-biological particles using 533/30 filter in FL1 (indicative of nucleic acid content), 670 LP in FL3 (indicative of chlorophyll content), and FSC (indicative of cell size). Data were analyzed using the BD Accuri C6 software. A non-dye sample was included to control for auto-fluorescence.

### Culturable Bacteria

100µL of each water and sediment wash sample was plated onto both LB agar (Fisher BioReagents) and Coliform agar (Millipore Sigma) and incubated overnight at 37°C. CFU per plate were counted after 24 hr incubation. Colonies on coliform agar were scored as dark-blue (*Escherichia coli*), pink ('coliform'), or white/transparent ('other'). Units are reported in CFU/100mL for water samples and CFU/10g for sediment samples.

### Galleria mellonella assay for environmental samples

Final instar waxmoth (*Galleria mellonella*) larvae (~220mg each) were purchased from Livefood UK (<http://www.livefood.co.uk>), stored in the dark at 4°C, and used within two weeks (all experiments utilized larvae from the same batch). A 100µL Hamilton syringe (Sigma-Aldrich Ltd) with 0.3 x 13mm needle (BD Microlance 3) was used to inject larvae with 10µL of sample into the last left proleg. New sterile needles were used for injection of each sample, and the syringe was cleaned between sample injections with 70% ethanol and sterile M9 buffer. All water and sediment wash samples (8 locations x 2 timepoints) were assayed in one experiment using 20 *Galleria* per sample. Three negative controls were used for each experiment: a no-injection control (to control for background larvae mortality), a buffer control in which larvae were injected with 10µL of M9 buffer (to control for impact of physical trauma), and a filter-sterilized sample control in which larvae were injected with filter-sterilized samples (0.22 µm syringe filters, Thermo Fisher) to control for any toxic chemicals present in the sample. Before injection, the *Galleria* larvae were separated into Petri dishes in groups of 20 and anesthetized by placing

on ice for approximately 30 minutes before injection. After injection, Petri dishes were incubated at 37°C and inspected at 24, 48 and 72 hours post-injection to record morbidity and mortality. *Galleria* larvae were considered infected if they expressed dark pigmentation (melanisation) after inoculation. Larvae were scored as dead if they did not respond to touch stimuli by blunt sterile forceps.

#### *Galleria mellonella* assay for individual clones

To isolate and identify responsible pathogens, selected samples showing high *Galleria* mortality were inoculated and incubated again as described above. Eight live larvae showing signs of infection (melanisation) were selected at random from each sample group and dissected for haemocoel collection. Before haemocoel collection, the *Galleria* larvae were anesthetized on ice for 30 minutes and the site of dissection was sterilized with 70% ethanol. Sterile micro-scissors were used to remove the last left proleg, and a drop of haemocoel was allowed to exude from the larvae before being collected with a pipette. Approximately 5-15µL of haemocoel was collected per larva and diluted into 500µL of sterile M9 buffer in an Eppendorf tube. Serial dilutions of each sample were plated onto LB- and coliform agar plates and incubated overnight at 37°C. A single clone per sample was picked from these plates and grown for 24 hours in 5mL of LB broth at 37°C at 180 rpm. Overnight cultures were diluted in broth to a turbidity equivalent to a McFarland standard of 0.5 at 625 nm as measured by spectrophotometry (Bibby Scientific Limited, Staffordshire, UK). A serial dilution was plated on LB agar and incubated for 24 hours at 37°C. LB agar plate colony counts were used to calculate CFU/mL. Individual clones were used to inoculate groups of 20 *Galleria* larvae with 10µL of 1x10<sup>2</sup> CFU, 1x10<sup>4</sup> CFU, and 1x10<sup>6</sup> CFU. Larvae were incubated as described in the previous section and morbidity and mortality was recorded hourly after an initial 10-hour period for a period of 37 hours allowing for construction of survival plots and calculation of the 50% lethal dose value (LD<sub>50</sub>).

#### Whole Genome Sequencing

DNA isolation, Illumina HiSeq sequencing and basic bioinformatics was performed through the MicrobeNG program in Birmingham, UK. Vials containing beads inoculated with liquid culture were washed with extraction buffer containing lysostaphin and RNase A, incubated for 25 min at 37°C. Proteinase K and RNaseA were added and incubated for 5 min at 65°C. Genomic DNA was purified using an equal volume of SPRI beads and resuspended in EB buffer. DNA was quantified in triplicates with the Quantit dsDNA HS assay in an Eppendorff AF2200 plate reader. Genomic DNA libraries were prepared using Nextera XT Library Prep Kit (Illumina, San Diego, USA) following the manufacturer's protocol with the following modifications: two nanograms of DNA instead of one were used as input, and PCR elongation time was increased to 1 min from 30 seconds. DNA quantification and library preparation were carried out on a Hamilton Microlab STAR automated liquid handling system. Pooled libraries were quantified using the Kapa Biosystems Library Quantification Kit for Illumina on a Roche light cycler 96 qPCR machine. Libraries were sequenced on the Illumina HiSeq using a 250bp paired end protocol.

### Bioinformatics

Reads were adapter trimmed using Trimmomatic 0.30 with a sliding window quality cutoff of Q15 (Bolger et al 2014). De novo assembly was performed on samples using SPAdes version 3.7 (Bankevich et al 2012), and contigs were annotated using Prokka 1.11 (Seemann 2014). Kraken was used to indicate the likely species classification of our isolates (Wood and Salzberg 2014). For species with established MLST schemes, the sequence type of each isolate was identified using the Centre for Genomic Epidemiology MLST tool (Larsen et al 2012). Other isolates belonging to the same sequence types were found and accessed using databases Enterobase (Alikhan et al 2018) (*E. coli*) and (Jolley and Maiden 2010) (*P. aeruginosa*). Whole genome alignments were constructed using Progressive Mauve (Darling et al 2010). Percentage similarity was calculated using the number of SNPs found between the query isolate and the reference sequence. In the case of *V. injenesis* where a closed reference genome was not available, nucleotide identity was

confirmed using a core genome alignment to closely related draft genome. Core genomes were constructed using Roary 3.12.0 (Page et al 2015).

Differences in gene content (95% nucleotide identity threshold) between the *V. injenensis* reference strain and the *V. injenensis* clone isolated in this study were also identified using Roary 3.12.0. The presence of PCAMU-SGI1 in the *P. mirabilis* isolate was assessed using BLAST (Altschul et al 1990). Assemblies were screened for antimicrobial resistance related genes and virulence related genes using ABRicate (<https://github.com/tseemann/abricat>) using 90% and 75% nucleotide identity, and 80% length identity cut offs. The CARD database was used to identify AMR genes (McArthur et al 2013), and the VFDB virulence factor database was used to find putative virulence factors (Chen et al 2015). BRIG version 0.95 was used to represent circular draft assemblies and indicate the position of AMR and virulence genes on each contig (Alikhan et al 2011). Contigs were ordered by whole genome alignment against a reference genome using progressive mauve (Darling et al 2010). The *E. coli* isolate was aligned against K-12 substr. MG1655 (NC\_000913.3), the *P. mirabilis* isolate was aligned against HI4320 (NC\_010554.1), and the *P. aeruginosa* against PAO1 (NC\_002516.2). The *V. injenensis* genome could not be aligned to a closed reference genome and so the contigs could not be ordered or separated by chromosome.

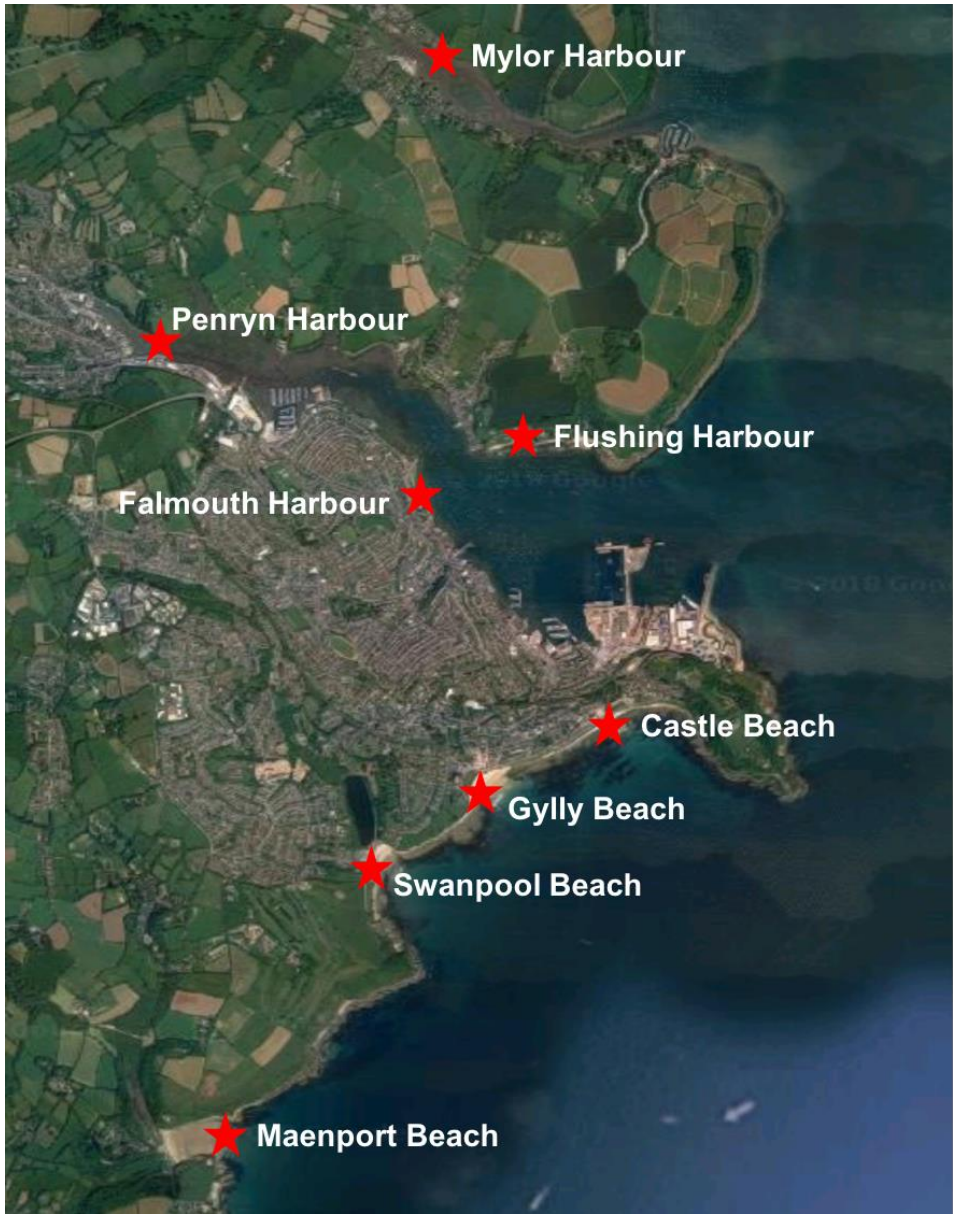

Figure S1: Sampling sites around Falmouth, Cornwall, U.K. (50°.16' N 5°.10' W).

## Supplementary Results

Figure S2. *Galleria* survival (%; 20 individuals per group) 24, 48 and 72 hours post-injection with 10 $\mu$ l of 100-fold concentrated water (panel B, 21<sup>st</sup> June, panel D, 6<sup>st</sup> July) or sediment wash (see Supplemental Methods) (panel A, 21<sup>st</sup> June, panel C, 6<sup>st</sup> July). Different colours denote different localities.

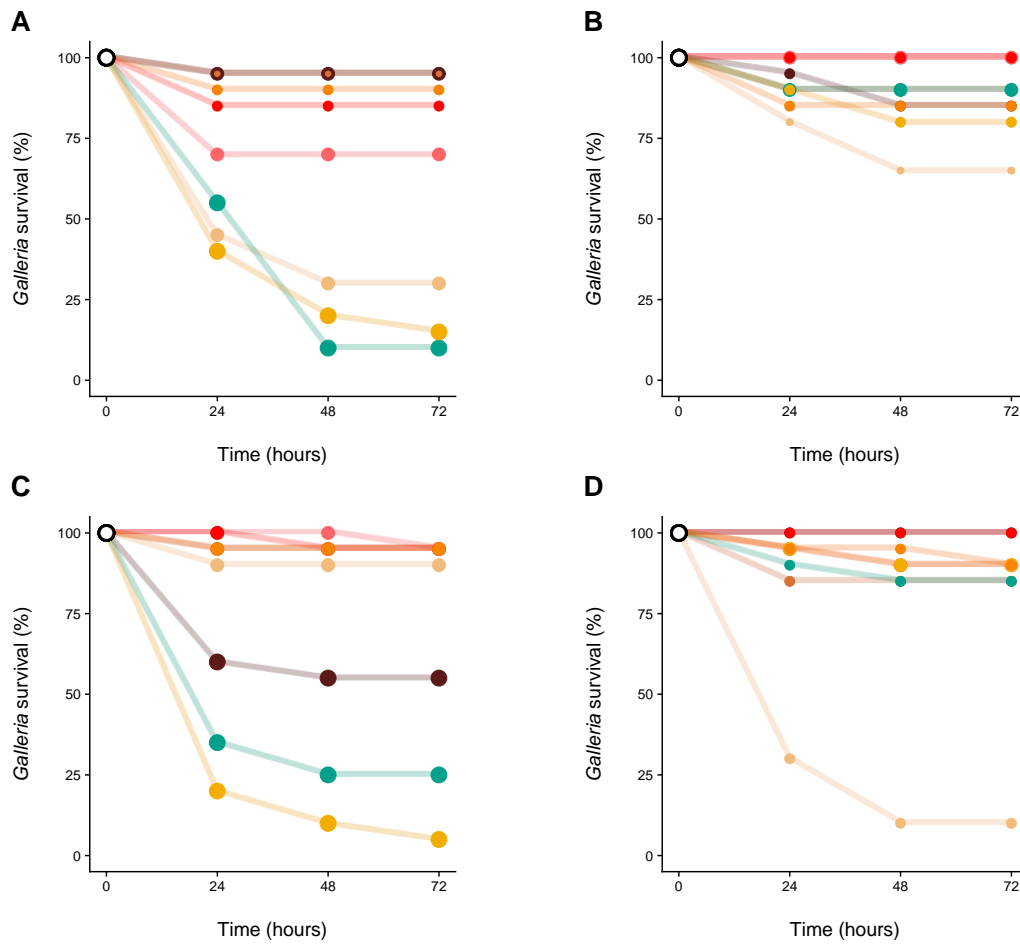

### Correlation of virulence with measures of bacterial density

Bacterial density in water and sediment wash samples was quantified in four ways: 1) total density by flow cytometry, 2) total colony counts on LB agar, 3) total colony counts on coliform agar (dark-blue, pink and white/transparent colonies that include gram-negative, non-enteric bacteria) and 4) *E. coli* and coliform colony counts (only dark-blue and pink colonies on coliform agar) (Figure S3). Generalized linear mixed effects models (glmer function from the 'glmm' R package) were used to test the additive effects of bacterial cell density ( $\log_{10} + 1$ ) and sample type (sediment versus water) on *Galleria* mortality with a binomial error structure and random intercepts fitted for sampling date, and location nested within sampling date. Separate models were fitted for each of the four different measures of bacterial cell density. Crucially, we found that *Galleria* mortality was strongly, and positively, dependent on cell density for all different density measures (Figure S4 and Table S1). We also found that *Galleria* mortality was significantly lower (for a given bacterial count) when larvae were injected with water samples compared to sediment samples. This could point at the sediment being inhabited by different, more pathogenic bacteria. The exception to this was formed by estimates based on flow cytometry (Table S1), potentially because culture-based approaches reflect total bacterial density more reliably. There was a strong correlation between coliform cells and total counts on coliform agar with two notable exceptions: Castle Beach water and Penryn sediment (both sampled 6 July); both samples had high mortality, presumably due to these non-coliform bacteria.



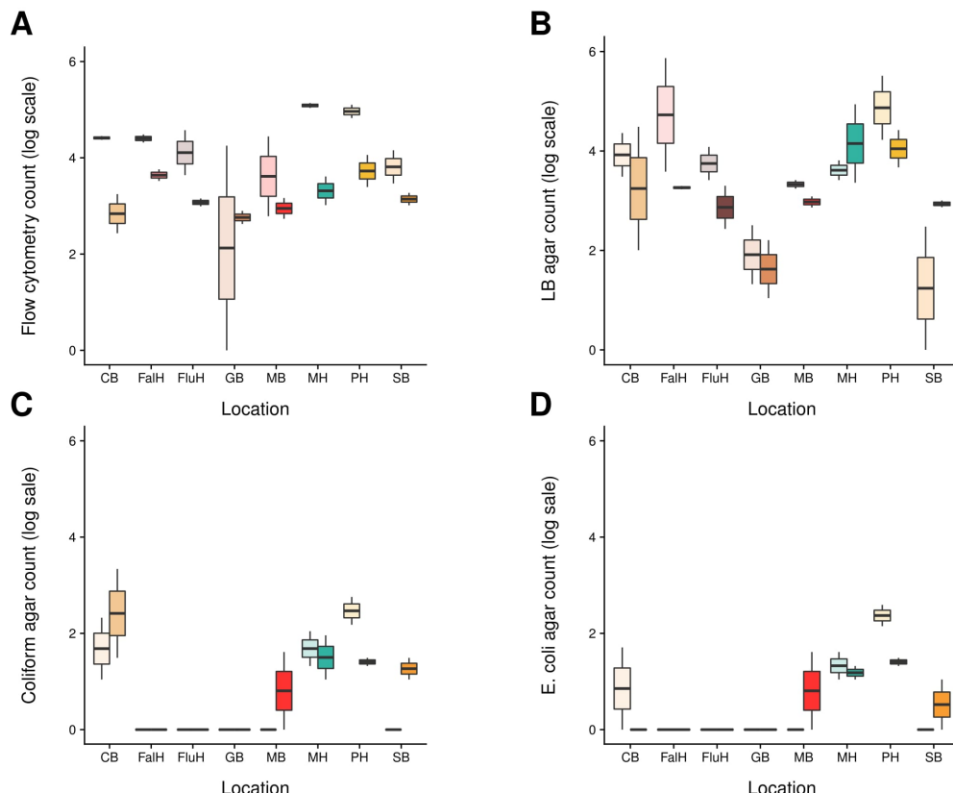

Figure S3. Boxplot summarizing variation in bacterial densities (expressed as  $\log_{10}$  cells per 100 ml) across eight different locations (see text) and sample types (water versus sediment, where water samples are depicted first per location). Bacterial cell densities were enumerated using: A) flow cytometry, (B) total LB agar counts, (C) total coliform agar counts and (D) *E. coli* and coliform counts (blue and pink colonies on coliform agar).

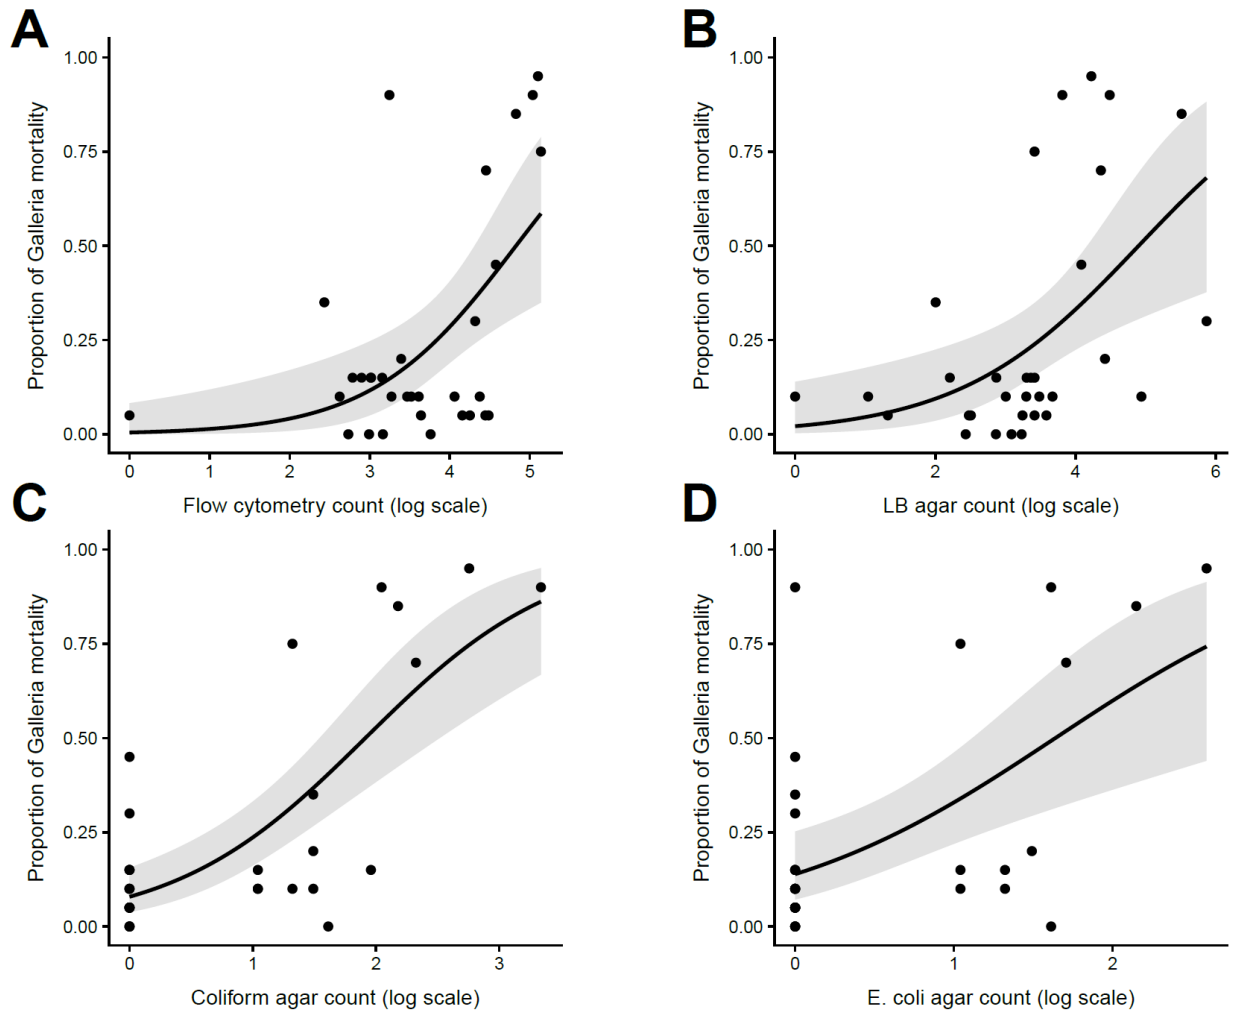

Figure S4. Plots depicting the relationship between *Galleria* mortality and bacterial cell density, estimated using: (A) flow cytometry, (B) total LB cell counts, (C) total coliform agar counts and (D) *E. coli* and coliform counts (blue and pink colonies on coliform agar). Lines and shaded area depict the fitted relationships  $\pm$  standard error (see Table S1 for parameter estimates).

**Table S1.** Results of the generalized linear mixed effects models (glmer) testing the additive effects of bacterial cell density ( $\log_{10} + 1$ ) and sample type (sediment versus water) on *Galleria* mortality with a binomial error structure and random intercepts fitted for sampling date, and location nested within sampling data. Separate models were fitted for different estimates of bacterial density (1-4). The most parsimonious model was arrived at by sequentially deleting terms and comparing model fits using  $\chi^2$ -tests of likelihood ratios.

| <b>1. Flow cytometry</b>        | Parameter estimate $\pm$ SE <sup>§</sup>     | $\chi^2$ -test                                                         |
|---------------------------------|----------------------------------------------|------------------------------------------------------------------------|
| Intercept                       | -4.02 $\pm$ 1.01 <sup>***</sup> , z = -3.99  | $\chi^2_{1,3} = 25.34, p < 0.001$<br>$\chi^2_{1,4} = 0.001, p = 0.97$  |
| Density                         | 0.63 $\pm$ 0.23 <sup>**</sup> , z = 2.78     |                                                                        |
| Sample                          | -0.01 $\pm$ 0.34 <sup>NS</sup> , z = -0.04   |                                                                        |
| Date                            | Standard deviation <0.001                    |                                                                        |
| Date/Location                   | Standard deviation = 0.61                    |                                                                        |
| <b>2. LB agar counts</b>        |                                              |                                                                        |
| Intercept                       | -3.00 $\pm$ 0.49 <sup>***</sup> , z = -6.11  | $\chi^2_{1,4} = 14.48, p < 0.001$<br>$\chi^2_{1,4} = 9.34, p < 0.01$   |
| Density                         | 0.47 $\pm$ 0.12 <sup>***</sup> , z = 3.85    |                                                                        |
| Sample                          | -0.62 $\pm$ 0.20 <sup>**</sup> , z = -3.04   |                                                                        |
| Date                            | Standard deviation <0.001                    |                                                                        |
| Date/Location                   | Standard deviation = 0.62                    |                                                                        |
| <b>3. Total coliform counts</b> |                                              |                                                                        |
| Intercept                       | -1.97 $\pm$ 0.17 <sup>***</sup> , z = -11.73 | $\chi^2_{1,4} = 48.53, p < 0.001$<br>$\chi^2_{1,4} = 43.39, p < 0.001$ |
| Density                         | 0.78 $\pm$ 0.09 <sup>***</sup> , z = 8.94    |                                                                        |
| Sample                          | -0.92 $\pm$ 0.20 <sup>***</sup> , z = -4.62  |                                                                        |
| Date                            | Standard deviation <0.001                    |                                                                        |
| Date/Location                   | Standard deviation < 0.001                   |                                                                        |
| <b>4. E. coli counts</b>        |                                              |                                                                        |
| Intercept                       | -1.76 $\pm$ 0.23 <sup>***</sup> , z = -7.76  | $\chi^2_{1,4} = 11.32, p < 0.001$<br>$\chi^2_{1,4} = 7.99, p < 0.01$   |
| Density                         | 0.62 $\pm$ 0.09 <sup>***</sup> , z = 3.82    |                                                                        |
| Sample                          | -0.57 $\pm$ 0.20 <sup>**</sup> , z = -2.82   |                                                                        |
| Date                            | Standard deviation <0.001                    |                                                                        |
| Date/Location                   | Standard deviation = 0.52                    |                                                                        |

§ The 'Sample' effect in the fitted models provides a measure of the extent to which water and sediment differ in their effect on *Galleria* mortality, where negative values indicate a lower detrimental effect of water on *Galleria* mortality (i.e., smaller estimated intercept) compared to sediment (Intercept).  $P < 0.001$  <sup>\*\*\*</sup>,  $P < 0.01$  <sup>\*\*</sup>.

### Isolation of pathogenic clones

Individual pathogenic clones were isolated from four samples showing high mortality, genomes of which are described in the main text. The Penryn Harbour sediment (sampled 6 July) yielded a white coloured clone on coliform agar and a 'bubble-wrap' colony morphology on LB agar which was identified as *Proteus mirabilis*. Interestingly, this clone did not cause the usual melanisation in *Galleria* but instead, the larvae turned brown, indicating a different pathogenicity mechanism. Castle Beach sediment (sampled 21 June) yielded a transparent clone on LB agar which was identified as *Vibrio injenensis*. Castle Beach water (sampled 6 July) yielded a bright green clone on LB agar identified as *Pseudomonas aeruginosa* ST-667. Mylor Harbour sediment (sampled 6 July) yielded a dark-blue clone on coliform agar, which was identified as *Escherichia coli* ST-3304.

Tables with virulence- and antibiotic resistance genes found in the four genome-sequenced isolates. Hits tabulated in white are >90% nucleotide similarity (>80% coverage) and hits tabulated in grey are >75% nucleotide similarity (>80% coverage).

Table S2 Virulence genes detected in *Proteus mirabilis* Penryn Harbour clone.

| gene name   | nt identity (%) | coverage (%) | acc. nr.     | description                                    |
|-------------|-----------------|--------------|--------------|------------------------------------------------|
| <i>flhC</i> | 76.11           | 93.99        | YP_001006783 | flagellar biosynthesis transcription activator |

Table S3 Antibiotic resistance genes detected in *Proteus mirabilis* Penryn Harbour clone.

| gene name                           | nt identity (%) | coverage (%) | acc. nr.                 | description                                                                                                                       |
|-------------------------------------|-----------------|--------------|--------------------------|-----------------------------------------------------------------------------------------------------------------------------------|
| <i>sul1</i>                         | 100             | 100          | JF969163:1054-1894       | a sulfonamide resistant dihydropteroate synthase of Gram-negative bacteria linked to other resistance genes of class 1 integrons. |
| <i>tet(J)</i>                       | 98.16           | 100          | AF038993:1-1198          | a tetracycline efflux protein expressed in Gram-negative bacteria ( <i>Escherichia</i> , <i>Morganella</i> and <i>Proteus</i> ).  |
| <i>CRP</i>                          | 80.41           | 99.84        | AP009048:4153664-4154297 | a global regulator that represses MdtEF multidrug efflux pump expression.                                                         |
| <i>dfrA15</i>                       | 84.63           | 100          | KF534911:40-514          | an integron-encoded dihydrofolate reductase found in <i>Vibrio cholerae</i>                                                       |
| <i>plasmid-encoded_cat_(pp-cat)</i> | 79.33           | 94.4         | D16171:383-1043          | a plasmid-encoded variant of the cat gene found in <i>Photobacterium damsela</i> subsp. <i>piscicida</i>                          |

Table S4 Virulence genes detected in *Vibrio injenensis* Castle Beach clone.

|                  |       |       |           |                                                 |
|------------------|-------|-------|-----------|-------------------------------------------------|
| <i>rtxC*</i>     | 96.97 | 100   | NP_231093 | RTX toxin activating protein                    |
| <i>hcp-2</i>     | 83.65 | 99.81 | NP_232418 | type VI secretion system substrate              |
| <i>luxS</i>      | 75.94 | 82.47 | NP_230208 | S-ribosylhomocysteinase                         |
| <i>rtxB</i>      | 82.17 | 99.49 | NP_231091 | RTX toxin transporter                           |
| <i>rtxD</i>      | 79.69 | 99.93 | NP_231090 | RTX toxin transporter                           |
| <i>vipA/mglA</i> | 75    | 99.8  | NP_232508 | type VI secretion system tubule-forming protein |
| <i>vipB/mglB</i> | 79.53 | 96.75 | NP_232509 | type VI secretion system tubule-forming protein |
| <i>vscN2</i>     | 77.37 | 99.92 | NP_800848 | type III secretion system ATPase                |

\*= The *rtxA* gene which is the exotoxin is present at 88% similarity but in two parts (coverage 74.62% and 24.52%) suggesting it might be inactive. The Castle Beach clone carries a zonula occludens toxin (Zot) known to increase mammalian gut permeability (74% amino acid similarity to the fish pathogen *V. anguillarum* (Castillo et al 2017) which is not present in the *V. injenensis* Type Strain.

Table S5 Antibiotic resistance genes detected in *Vibrio injenensis* Castle Beach clone.

| gene name    | nt identity (%) | coverage (%) | acc. nr.                 | description                                                                                                                    |
|--------------|-----------------|--------------|--------------------------|--------------------------------------------------------------------------------------------------------------------------------|
| <i>tet34</i> | 75.05           | 100          | AB061440:306-771         | causes the activation of Mg <sup>2+</sup> -dependent purine nucleotide synthesis which protects the protein synthesis pathway. |
| <i>CRP</i>   | 79.84           | 99.53        | AP009048:4153664-4154297 | a global regulator that represses MdtEF multidrug efflux pump expression.                                                      |

Table S6 Virulence genes detected in *Pseudomonas aeruginosa* Castle Beach clone.

| gene name         | nt identity (%) | coverage (%) | acc. nr.  | description                                                                        |
|-------------------|-----------------|--------------|-----------|------------------------------------------------------------------------------------|
| <i>alg44</i>      | 99.66           | 100          | NP_252232 | alginate biosynthesis protein <i>Alg8</i>                                          |
| <i>alg8</i>       | 99.8            | 100          | NP_252231 | alginate-c5-mannuronan-epimerase <i>AlgG</i>                                       |
| <i>algA</i>       | 98.82           | 100          | NP_252241 | phosphomannose isomerase / guanosine 5'-diphospho-D-mannose pyrophosphorylase      |
| <i>algB</i>       | 99.19           | 100          | NP_254170 | two-component response regulator                                                   |
| <i>algC</i>       | 99.14           | 100          | NP_254009 | phosphomannomutase                                                                 |
| <i>algD</i>       | 99.24           | 100          | NP_252230 | GDP-mannose 6-dehydrogenase                                                        |
| <i>algE</i>       | 99.66           | 100          | NP_252234 | alginate biosynthetic protein <i>AlgK</i> precursor                                |
| <i>algF</i>       | 99.69           | 100          | NP_252240 | alginate o-acetyltransferase                                                       |
| <i>algG</i>       | 99.63           | 100          | NP_252235 | outer membrane protein <i>AlgE</i>                                                 |
| <i>algI</i>       | 99.49           | 100          | NP_252238 | alginate o-acetyltransferase                                                       |
| <i>algJ</i>       | 99.15           | 100          | NP_252239 | alginate o-acetyltransferase                                                       |
| <i>algK</i>       | 99.72           | 100          | NP_252233 | alginate biosynthesis protein <i>Alg44</i>                                         |
| <i>algL</i>       | 99.28           | 100          | NP_252237 | poly(beta-d-mannuronate) lyase precursor                                           |
| <i>algP/algR3</i> | 97.17           | 98.87        | NP_253940 | alginate regulatory protein                                                        |
| <i>algQ</i>       | 99.17           | 100          | NP_253942 | alginate regulatory protein                                                        |
| <i>algR</i>       | 99.6            | 100          | NP_253948 | alginate biosynthesis regulatory protein <i>AlgR</i>                               |
| <i>algU</i>       | 99.14           | 100          | NP_249453 | alginate biosynthesis protein <i>AlgZ/FimS</i>                                     |
| <i>algW</i>       | 98.72           | 100          | NP_253136 | <i>AlgW</i> protein [Alginate regulation]                                          |
| <i>algX</i>       | 99.16           | 100          | NP_252236 | alginate biosynthesis protein                                                      |
| <i>algZ</i>       | 99.35           | 100          | NP_253949 | sigma factor <i>AlgU</i> [Alginate (VF0091)] [ <i>Pseudomonas aeruginosa</i> PAO1] |
| <i>aprA</i>       | 99.24           | 100          | NP_249940 | alkaline metalloproteinase precursor                                               |

|                  |       |       |           |                                                                                     |
|------------------|-------|-------|-----------|-------------------------------------------------------------------------------------|
| <i>chpA</i>      | 98.66 | 99.92 | NP_249104 | still frameshift probable component of chemotactic signal transduction system       |
| <i>chpB</i>      | 98.64 | 100   | NP_249105 | probable methylesterase                                                             |
| <i>chpC</i>      | 98.82 | 100   | NP_249106 | probable chemotaxis protein                                                         |
| <i>chpD</i>      | 99.12 | 100   | NP_249107 | probable transcriptional regulator                                                  |
| <i>chpE</i>      | 98.86 | 100   | NP_249108 | probable chemotaxis protein                                                         |
| <i>clpV1</i>     | 98.93 | 100   | NP_248780 | type VI secretion system AAA+ family ATPase                                         |
| <i>dotU1</i>     | 99.33 | 100   | NP_248768 | type VI secretion system protein                                                    |
| <i>exoT</i>      | 99.42 | 100   | NP_248734 | type III secretion system effector                                                  |
| <i>exoU</i>      | 99.42 | 100   | AAC16023  | type III secretion system effector                                                  |
| <i>exsA</i>      | 98.69 | 100   | NP_250404 | type III secretion system regulatory protein                                        |
| <i>exsB</i>      | 98.07 | 100   | NP_250403 | type III secretion system pilotin                                                   |
| <i>exsC</i>      | 97.49 | 100   | NP_250401 | type III secretion system regulatory protein                                        |
| <i>exsD</i>      | 99.16 | 100   | NP_250405 | type III secretion system regulatory protein                                        |
| <i>exsE</i>      | 96.75 | 100   | NP_250402 | type III secretion system regulatory protein                                        |
| <i>fha1</i>      | 96.19 | 96.99 | NP_248771 | type VI secretion system forkhead-associated protein                                |
| <i>fimT</i>      | 97.06 | 100   | NP_253239 | type 4 fimbrial biogenesis protein                                                  |
| <i>fimU</i>      | 99.61 | 100   | NP_253240 | type 4 fimbrial biogenesis protein                                                  |
| <i>fimV</i>      | 98.27 | 100   | NP_251805 | putative Type IV pili related protein                                               |
| <i>fleI/flag</i> | 99.73 | 100   | NP_249784 | flagellar protein                                                                   |
| <i>fleN</i>      | 99.29 | 100   | NP_250145 | flagellar synthesis regulator FleN                                                  |
| <i>fleP</i>      | 99.33 | 100   | NP_249787 | flagellar protein FlIT [Deoxyhexose linking sugar 209 Da capping structure (A1138)] |
| <i>fleQ</i>      | 99.19 | 100   | NP_249788 | transcriptional regulator                                                           |
| <i>fleR</i>      | 98.94 | 100   | NP_249790 | two-component response regulator                                                    |
| <i>fleS</i>      | 99.09 | 100   | NP_249789 | two-component sensor                                                                |
| <i>flgA</i>      | 99.28 | 100   | NP_252040 | flagellar basal body P-ring biosynthesis protein                                    |
| <i>flgB</i>      | 99.75 | 100   | NP_249768 | flagellar basal body rod protein                                                    |
| <i>flgC</i>      | 100   | 100   | NP_249769 | flagellar basal-body rod protein                                                    |
| <i>flgD</i>      | 99.16 | 100   | NP_249770 | flagellar basal-body rod modification protein                                       |
| <i>flgE</i>      | 98.56 | 100   | NP_249771 | flagellar hook protein                                                              |
| <i>flgF</i>      | 99.07 | 100   | NP_249772 | flagellar basal-body rod protein                                                    |
| <i>flgG</i>      | 99.24 | 100   | NP_249773 | flagellar basal-body rod protein                                                    |
| <i>flgH</i>      | 98.85 | 100   | NP_249774 | flagellar L-ring protein precursor                                                  |
| <i>flgI</i>      | 99.46 | 100   | NP_249775 | flagellar P-ring protein precursor                                                  |
| <i>flgJ</i>      | 99.25 | 100   | NP_249776 | flagellar rod assembly protein/muramidase                                           |
| <i>flgK</i>      | 99.12 | 100   | NP_249777 | flagellar hook-associated protein 1                                                 |

|                    |       |       |           |                                                                                                                     |
|--------------------|-------|-------|-----------|---------------------------------------------------------------------------------------------------------------------|
| <i>flgL</i>        | 99.32 | 100   | NP_249778 | flagellar hook-associated protein 3                                                                                 |
| <i>flgM</i>        | 98.46 | 100   | NP_252041 | negative regulator of flagellin synthesis                                                                           |
| <i>flgN</i>        | 98.73 | 100   | NP_252042 | flagella synthesis protein                                                                                          |
| <i>flhA</i>        | 99.01 | 100   | NP_250143 | flagellar biosynthesis protein                                                                                      |
| <i>flhB</i>        | 98.94 | 100   | NP_250140 | flagellar biosynthetic protein                                                                                      |
| <i>flhF</i>        | 98.92 | 100   | NP_250144 | flagellar biosynthesis protein                                                                                      |
| <i>fliA</i>        | 99.46 | 100   | NP_250146 | flagellar biosynthesis sigma factor                                                                                 |
| <i>fliC</i>        | 99.52 | 100   | NP_249783 | B-type flagellin                                                                                                    |
| <i>fliD</i>        | 98.95 | 100   | NP_249785 | flagellar capping protein                                                                                           |
| <i>fliE</i>        | 99.7  | 100   | NP_249791 | flagellar hook-basal body complex protein                                                                           |
| <i>fliF</i>        | 99.56 | 100   | NP_249792 | flagellar M-ring protein                                                                                            |
| <i>fliG</i>        | 99.7  | 100   | NP_249793 | flagellar motor switch protein G                                                                                    |
| <i>fliH</i>        | 98.39 | 100   | NP_249794 | flagellar assembly protein H                                                                                        |
| <i>fliI</i>        | 99.26 | 100   | NP_249795 | flagellum-specific ATP synthase                                                                                     |
| <i>fliJ</i>        | 99.78 | 100   | NP_249796 | flagellar protein                                                                                                   |
| <i>fliK</i>        | 97.2  | 100   | NP_250132 | flagellar hook-length control protein                                                                               |
| <i>fliL</i>        | 99.62 | 100   | NP_250133 | flagellar basal body protein                                                                                        |
| <i>fliM</i>        | 99.9  | 100   | NP_250134 | flagellar motor switch protein                                                                                      |
| <i>fliN</i>        | 99.58 | 100   | NP_250135 | flagellar motor switch protein                                                                                      |
| <i>fliO</i>        | 99.56 | 100   | NP_250136 | flagellar protein FliO                                                                                              |
| <i>fliP</i>        | 99.09 | 100   | NP_250137 | flagellar biosynthetic protein                                                                                      |
| <i>fliQ</i>        | 99.63 | 100   | NP_250138 | flagellar biosynthetic protein                                                                                      |
| <i>fliR</i>        | 98.58 | 99.36 | NP_250139 | flagellar biosynthetic protein                                                                                      |
| <i>fliS</i>        | 99.47 | 100   | NP_249786 | flagellar protein                                                                                                   |
| <i>fptA</i>        | 98.84 | 100   | NP_252911 | Fe(III)-pyochelin receptor precursor                                                                                |
| <i>hcp1</i>        | 100   | 100   | NP_248775 | type VI secretion system substrate                                                                                  |
| <i>hsiA1</i>       | 98.65 | 100   | NP_248772 | type VI secretion system hcp secretion island protein                                                               |
| <i>hsiB1/vipA</i>  | 100   | 100   | NP_248773 | type VI secretion system tubule-forming protein                                                                     |
| <i>hsiC1/vipB</i>  | 99.6  | 100   | NP_248774 | type VI secretion system tubule-forming protein                                                                     |
| <i>hsiE1</i>       | 99.05 | 100   | NP_248776 | type VI secretion system hcp secretion island protein interacting with HsiB1 to form a novel subcomplex of the T6SS |
| <i>hsiF1</i>       | 99.22 | 100   | NP_248777 | type VI secretion system hcp secretion island protein, a gp25-like protein but not exhibit lysozyme activity        |
| <i>hsiG1</i>       | 99.03 | 100   | NP_248778 | type VI secretion system hcp secretion island protein                                                               |
| <i>hsiH1</i>       | 98.57 | 100   | NP_248779 | type VI secretion system hcp secretion island protein                                                               |
| <i>hsiJ1</i>       | 99.33 | 100   | NP_248769 | type VI secretion system hcp secretion island protein                                                               |
| <i>icmF1/tssM1</i> | 98.91 | 100   | NP_248767 | type VI secretion system protein                                                                                    |



|                  |       |     |           |                                                                                                        |
|------------------|-------|-----|-----------|--------------------------------------------------------------------------------------------------------|
| <i>lasA</i>      | 97.85 | 100 | NP_250562 | LasA protease precursor                                                                                |
| <i>lasB</i>      | 98.4  | 100 | NP_252413 | elastase                                                                                               |
| <i>lasI</i>      | 99.17 | 100 | NP_250123 | autoinducer synthesis protein                                                                          |
| <i>lip1</i>      | 99.57 | 100 | NP_248770 | lipoprotein                                                                                            |
| <i>mbtH-like</i> | 100   | 100 | NP_251102 | MbtH-like protein from the pyoverdine cluster                                                          |
| <i>motA</i>      | 97.89 | 100 | NP_253641 | flagellar motor protein [Deoxyhexose linking sugar 209 Da capping structure (A1138)]                   |
| <i>motB</i>      | 99.14 | 100 | NP_253640 | flagellar motor protein [Deoxyhexose linking sugar 209 Da capping structure (A1138)]                   |
| <i>motC</i>      | 98.65 | 100 | NP_250151 | flagellar motor protein [Deoxyhexose linking sugar 209 Da capping structure (A1138)]                   |
| <i>motD</i>      | 98.43 | 100 | NP_250152 | flagellar motor protein [Deoxyhexose linking sugar 209 Da capping structure (A1138)]                   |
| <i>motY</i>      | 99.59 | 100 | NP_252216 | probable outer membrane protein precursor [Deoxyhexose linking sugar 209 Da capping structure (A1138)] |
| <i>mucA</i>      | 99.14 | 100 | NP_249454 | alkaline metalloproteinase precursor [Alginate (VF0091)]                                               |
| <i>mucB</i>      | 98.95 | 100 | NP_249455 | anti-sigma factor MucA inhibitor of alg gene expression                                                |
| <i>mucC</i>      | 99.78 | 100 | NP_249456 | negative regulator for alginate biosynthesis MucB [Alginate (VF0091)]                                  |
| <i>mucD</i>      | 98.88 | 100 | NP_249457 | serine protease MucD precursor [Alginate regulation (CVF523)]                                          |
| <i>mucE</i>      | 98.15 | 100 | NP_252722 | small envelope protein                                                                                 |
| <i>mucP</i>      | 99.04 | 100 | NP_252339 | metalloprotease protease                                                                               |
| <i>pchA</i>      | 98.95 | 100 | NP_252921 | salicylate biosynthesis isochorismate synthase                                                         |
| <i>pchB</i>      | 99.67 | 100 | NP_252920 | salicylate biosynthesis protein                                                                        |
| <i>pchC</i>      | 99.34 | 100 | NP_252919 | pyochelin biosynthetic protein                                                                         |
| <i>pchD</i>      | 98.78 | 100 | NP_252918 | pyochelin biosynthesis protein                                                                         |
| <i>pchE</i>      | 98.54 | 100 | NP_252916 | dihydroaeruginic acid synthetase                                                                       |
| <i>pchF</i>      | 98.45 | 100 | NP_252915 | pyochelin synthetase                                                                                   |
| <i>pchG</i>      | 99.14 | 100 | NP_252914 | pyochelin biosynthetic protein                                                                         |
| <i>pchH</i>      | 98.66 | 100 | NP_252913 | ABC transporter ATP-binding protein [                                                                  |
| <i>pchI</i>      | 98.9  | 100 | NP_252912 | ABC transporter ATP-binding protein [Pyochelin                                                         |
| <i>pchR</i>      | 98.99 | 100 | NP_252917 | transcriptional regulator                                                                              |
| <i>pcr1</i>      | 98.92 | 100 | NP_250390 | type III secretion system protein                                                                      |
| <i>pcr2</i>      | 98.92 | 100 | NP_250391 | type III secretion system protein                                                                      |
| <i>pcr3</i>      | 98.36 | 100 | NP_250392 | type III secretion system protein                                                                      |
| <i>pcr4</i>      | 98.79 | 100 | NP_250393 | type III secretion system protein                                                                      |
| <i>pcrD</i>      | 98.96 | 100 | NP_250394 | type III secretion system protein                                                                      |
| <i>pcrG</i>      | 99.66 | 100 | NP_250396 | type III secretion system cytoplasmic regulator                                                        |

|              |       |       |           |                                                                       |
|--------------|-------|-------|-----------|-----------------------------------------------------------------------|
| <i>pcrH</i>  | 99.21 | 100   | NP_250398 | type III secretion system regulatory protein                          |
| <i>pcrR</i>  | 99.31 | 100   | NP_250395 | type III secretion system regulatory protein                          |
| <i>pcrV</i>  | 98.98 | 100   | NP_250397 | type III secretion system hydrophilic translocator needle tip protein |
| <i>phzA1</i> | 96.16 | 90.59 | NP_252899 | phenazine biosynthesis protein                                        |
| <i>phzA1</i> | 99.39 | 100   | NP_252899 | phenazine biosynthesis protein                                        |
| <i>phzB1</i> | 98.36 | 100   | NP_252900 | phenazine biosynthesis protein                                        |
| <i>phzC1</i> | 99.18 | 100   | NP_252901 | phenazine biosynthesis protein                                        |
| <i>phzD1</i> | 98.88 | 100   | NP_252902 | phenazine biosynthesis protein                                        |
| <i>phzE1</i> | 99.1  | 100   | NP_252903 | phenazine biosynthesis protein                                        |
| <i>phzF1</i> | 99.16 | 100   | NP_252904 | phenazine biosynthesis protein                                        |
| <i>phzG1</i> | 99.53 | 100   | NP_252906 | phenazine biosynthesis protein                                        |
| <i>phzH</i>  | 98.91 | 100   | NP_248741 | phenazine-modifying enzyme                                            |
| <i>phzM</i>  | 99.4  | 100   | NP_252898 | phenazine-specific methyltransferase                                  |
| <i>phzS</i>  | 98.35 | 100   | NP_252907 | flavin dependent hydroxylase                                          |
| <i>pilB</i>  | 99    | 100   | NP_253216 | type 4 fimbrial biogenesis protein                                    |
| <i>pilE</i>  | 99.06 | 100   | NP_253246 | type 4 fimbrial biogenesis protein                                    |
| <i>pilF</i>  | 98.95 | 100   | NP_252494 | type 4 fimbrial biogenesis protein                                    |
| <i>pilG</i>  | 100   | 100   | NP_249099 | twitching motility protein                                            |
| <i>pilH</i>  | 99.18 | 100   | NP_249100 | twitching motility protein                                            |
| <i>pilI</i>  | 100   | 100   | NP_249101 | twitching motility protein                                            |
| <i>pilJ</i>  | 99.51 | 100   | NP_249102 | twitching motility protein                                            |
| <i>pilK</i>  | 99.2  | 100   | NP_249103 | methyltransferase PilK                                                |
| <i>pilM</i>  | 99.81 | 100   | NP_253731 | type IV pilus inner membrane platform protein                         |
| <i>pilN</i>  | 99.5  | 100   | NP_253730 | type IV pilus inner membrane platform protein                         |
| <i>pilO</i>  | 99.52 | 100   | NP_253729 | type IV pilus inner membrane platform protein                         |
| <i>pilP</i>  | 99.24 | 100   | NP_253728 | type IV pilus biogenesis protein                                      |
| <i>pilQ</i>  | 99.07 | 100   | NP_253727 | type 4 fimbrial biogenesis protein                                    |
| <i>pilR</i>  | 99.18 | 100   | NP_253237 | two-component response regulator PilR                                 |
| <i>pilS</i>  | 99.18 | 100   | NP_253236 | two-component sensor                                                  |
| <i>pilT</i>  | 99.61 | 100   | NP_249086 | twitching motility protein                                            |
| <i>pilU</i>  | 99.74 | 100   | NP_249087 | twitching motility protein                                            |
| <i>pilV</i>  | 99.1  | 100   | NP_253241 | type IV pilus biogenesis protein                                      |
| <i>pilW</i>  | 98.91 | 100   | NP_253242 | type IV fimbrial biogenesis protein                                   |
| <i>pilX</i>  | 99.32 | 100   | NP_253243 | type 4 fimbrial biogenesis protein                                    |
| <i>pilY1</i> | 93.35 | 99.43 | NP_253244 | type 4 fimbrial biogenesis protein                                    |
| <i>pilY2</i> | 96.26 | 100   | NP_253245 | type 4 fimbrial biogenesis protein                                    |
| <i>plcH</i>  | 96.08 | 100   | NP_249535 | hemolytic phospholipase C precursor                                   |

|             |       |       |           |                                                                          |
|-------------|-------|-------|-----------|--------------------------------------------------------------------------|
| <i>popB</i> | 99.15 | 100   | NP_250399 | type III secretion system hydrophobic translocator pore protein          |
| <i>popD</i> | 97.41 | 100   | NP_250400 | type III secretion system hydrophobic translocator pore protein          |
| <i>popN</i> | 99.42 | 100   | NP_250389 | type III secretion system outer membrane protein                         |
| <i>ppkA</i> | 99.23 | 100   | NP_248764 | serine/threonine protein kinase                                          |
| <i>pppA</i> | 99.45 | 100   | NP_248765 | Pseudomonas protein phosphatase                                          |
| <i>pscB</i> | 99.05 | 100   | NP_250406 | type III secretion system protein                                        |
| <i>pscC</i> | 99.5  | 100   | NP_250407 | type III secretion system secretin                                       |
| <i>pscD</i> | 99    | 100   | NP_250408 | type III secretion system basal body protein                             |
| <i>pscE</i> | 97.06 | 100   | NP_250409 | type III secretion system cochaperone                                    |
| <i>pscF</i> | 99.22 | 100   | NP_250410 | type III secretion system needle filament protein                        |
| <i>pscG</i> | 99.71 | 100   | NP_250411 | type III secretion system chaperone PscG                                 |
| <i>pscH</i> | 100   | 100   | NP_250412 | type III secretion system protein PscH                                   |
| <i>pscI</i> | 99.11 | 100   | NP_250413 | type III secretion system inner rod protein PscI                         |
| <i>pscJ</i> | 99.33 | 100   | NP_250414 | type III secretion system inner MS ring protein                          |
| <i>pscK</i> | 98.09 | 99.04 | NP_250415 | type III secretion system protein                                        |
| <i>pscL</i> | 98.61 | 100   | NP_250416 | type III secretion system protein                                        |
| <i>pscN</i> | 99.24 | 100   | NP_250388 | type III secretion system ATPase                                         |
| <i>pscO</i> | 99.37 | 100   | NP_250387 | type III secretion system protein                                        |
| <i>pscP</i> | 94.64 | 96.49 | NP_250386 | type III secretion system protein                                        |
| <i>pscQ</i> | 98.82 | 100   | NP_250385 | type III secretion system protein                                        |
| <i>pscR</i> | 99.85 | 100   | NP_250384 | type III secretion system protein                                        |
| <i>pscS</i> | 99.25 | 100   | NP_250383 | type III secretion system protein                                        |
| <i>pscT</i> | 99.24 | 100   | NP_250382 | type III secretion system protein                                        |
| <i>pscU</i> | 98.76 | 100   | NP_250381 | type III secretion system protein                                        |
| <i>ptxR</i> | 98.08 | 99.79 | NP_250948 | transcriptional regulator                                                |
| <i>pvcA</i> | 98.68 | 100   | NP_250944 | paerucumarin biosynthesis protein                                        |
| <i>pvcB</i> | 96.98 | 100   | NP_250945 | paerucumarin biosynthesis protein                                        |
| <i>pvcC</i> | 99.27 | 100   | NP_250946 | paerucumarin biosynthesis protein                                        |
| <i>pvcD</i> | 97.99 | 99.85 | NP_250947 | paerucumarin biosynthesis protein                                        |
| <i>pvdG</i> | 98.69 | 100   | NP_251115 | pyoverdine biosynthesis protein                                          |
| <i>pvdH</i> | 99.15 | 100   | NP_251103 | diaminobutyrate-2-oxoglutarate aminotransferase                          |
| <i>pvdL</i> | 98.8  | 100   | NP_251114 | peptide synthase [pyoverdine (IA001)]                                    |
| <i>pvdM</i> | 94.44 | 99.78 | NP_251083 | dipeptidase precursor [pyoverdine (IA001)] [Pseudomonas aeruginosa PAO1] |
| <i>pvdN</i> | 99.45 | 100   | NP_251084 | pyoverdine biosynthesis protein                                          |
| <i>pvdO</i> | 97.78 | 100   | NP_251085 | pyoverdine biosynthesis protein                                          |
| <i>pvdQ</i> | 99.13 | 100   | NP_251075 | 3-oxo-C12-homoserine lactone acylase                                     |

|                  |       |       |           |                                                                         |
|------------------|-------|-------|-----------|-------------------------------------------------------------------------|
| <i>pvdS</i>      | 97.34 | 100   | NP_251116 | extracytoplasmic-function sigma-70 factor                               |
| <i>rhlA</i>      | 99.1  | 100   | NP_252169 | rhamnosyltransferase chain A                                            |
| <i>rhlB</i>      | 99.61 | 100   | NP_252168 | rhamnosyltransferase chain B                                            |
| <i>rhlC</i>      | 97.03 | 100   | NP_249821 | rhamnosyltransferase 2                                                  |
| <i>rhlI</i>      | 100   | 100   | NP_252166 | autoinducer synthesis protein RhlI [Quorum sensing]                     |
| <i>tagF/pppB</i> | 98.68 | 100   | NP_248766 | Pseudomonas protein phosphatase                                         |
| <i>tagQ</i>      | 98.25 | 100   | NP_248760 | type VI secretion associated protein                                    |
| <i>tagR</i>      | 98.95 | 100   | NP_248761 | type IV secretion associated protein                                    |
| <i>tagS</i>      | 99.25 | 100   | NP_248762 | type IV secretion associated protein                                    |
| <i>tagT</i>      | 98.89 | 100   | NP_248763 | type six secretion associated protein                                   |
| <i>toxA</i>      | 99.01 | 100   | NP_249839 | exotoxin A precursor                                                    |
| <i>tse1</i>      | 99.57 | 100   | NP_250535 | type VI secretion system effector Tse1 peptidoglycanhydrolase           |
| <i>tse2</i>      | 98.53 | 100   | NP_251392 | type VI secretion system effector Tse2 [HSI-1 (Hcp-secretion island 1)] |
| <i>tse3</i>      | 98.94 | 100   | NP_252174 | type VI secretion system effector Tse3 glycoside hydrolase              |
| <i>vgrG1a</i>    | 98.45 | 100   | NP_248781 | type VI secretion system substrate                                      |
| <i>waaA</i>      | 99.53 | 100   | NP_253675 | lipopolysaccharide core biosynthesis protein WaaP                       |
| <i>waaC</i>      | 98.88 | 100   | NP_253698 | 3-deoxy-D-manno-octulosonic-acid (KDO) transferase                      |
| <i>waaF</i>      | 99.61 | 100   | NP_253699 | heptosyltransferase I                                                   |
| <i>waaG</i>      | 99.2  | 100   | NP_253697 | B-band O-antigen polymerase                                             |
| <i>waaP</i>      | 99.5  | 100   | NP_253696 | UDP-glucose:(heptosyl) LPS alpha 13-glucosyltransferase                 |
| <i>xcpA/pilD</i> | 99.65 | 99.31 | NP_253218 | type 4 prepilin peptidase PilD [Type IV pili]                           |
| <i>xcpP</i>      | 98.16 | 100   | NP_251794 | secretion protein                                                       |
| <i>xcpQ</i>      | 97.62 | 100   | NP_251795 | general secretion pathway protein D [xcp secretion system (VF0084)]     |
| <i>xcpR</i>      | 98.01 | 100   | NP_251793 | general secretion pathway protein E [xcp secretion system (VF0084)]     |
| <i>xcpS</i>      | 99.02 | 100   | NP_251792 | general secretion pathway protein F [xcp secretion system (VF0084)]     |
| <i>xcpT</i>      | 99.11 | 100   | NP_251791 | general secretion pathway protein G [xcp secretion system (VF0084)]     |
| <i>xcpU</i>      | 98.65 | 100   | NP_251790 | general secretion pathway protein H [xcp secretion system (VF0084)]     |
| <i>xcpV</i>      | 98.97 | 99.49 | NP_251789 | general secretion pathway protein I [xcp secretion system (VF0084)]     |
| <i>xcpW</i>      | 98.88 | 100   | NP_251788 | general secretion pathway protein J [xcp secretion system (VF0084)]     |
| <i>xcpX</i>      | 96.51 | 100   | NP_251787 | general secretion pathway protein K [xcp secretion system (VF0084)]     |
| <i>xcpY</i>      | 98.87 | 100   | NP_251786 | general secretion pathway protein L [xcp secretion system (VF0084)]     |
| <i>xcpZ</i>      | 99.24 | 100   | NP_251785 | general secretion pathway protein M [xcp secretion system (VF0084)]     |
| <i>phzB1</i>     | 89.89 | 88.96 | NP_252900 | phenazine biosynthesis protein                                          |
| <i>pilC</i>      | 76.17 | 98.31 | NP_253217 | still frameshift type 4 fimbrial biogenesis protein                     |
| <i>pvdA</i>      | 83.56 | 100   | NP_251076 | L-ornithine N5-oxygenase PvdA                                           |
| <i>pvdF</i>      | 82.49 | 100   | NP_251086 | pyoverdine synthetase F                                                 |
| <i>pvdP</i>      | 85.04 | 99.76 | NP_251082 | tyrosinase required for pyoverdine maturation                           |

Table S7 Antibiotic resistance genes detected in *Pseudomonas aeruginosa* Castle Beach clone.

|                    |       |     |                             |                                                                                                                                                                                                                                                                                                                                                                                               |
|--------------------|-------|-----|-----------------------------|-----------------------------------------------------------------------------------------------------------------------------------------------------------------------------------------------------------------------------------------------------------------------------------------------------------------------------------------------------------------------------------------------|
| <i>APH(3')-IIb</i> | 98.64 | 100 | X90856:388-1195             | a chromosomal-encoded aminoglycoside phosphotransferase                                                                                                                                                                                                                                                                                                                                       |
| <i>ArmR</i>        | 96.3  | 100 | NC_002516.2:4165719-4165881 | a 53-amino-acid antirepressor allosterically inhibits MexR dimer-DNA binding by occupying a hydrophobic binding cavity within the center of the MexR dimer. ArmR up-regulation and MexR-ArmR complex formation have previously been shown to upregulate MexAB-OprM.                                                                                                                           |
| <i>arnA</i>        | 98.99 | 100 | NC_002516.2:3982021-3984010 | modifies lipid A with 4-amino-4-deoxy-L-arabinose (Ara4N) which allows gram-negative bacteria to resist the antimicrobial activity of cationic antimicrobial peptides and antibiotics such as polymyxin.                                                                                                                                                                                      |
| <i>basS</i>        | 98.75 | 100 | JQ340365:1-1435             | Histidine protein kinase sensor Lipid A modification gene; part of a two-component system involved in polymyxin resistance that senses high extracellular Fe(2+)                                                                                                                                                                                                                              |
| <i>bcr-1</i>       | 98.92 | 100 | CP012901.1:5979157-5980366  | Transmembrane protein which expels bicyclomycin from the cell leading to bicyclomycin resistance. Identified in <i>P. aeruginosa</i> strains responsible for outbreaks in Brazil often appearing with blaSPM-1 another bicyclomycin resistance gene                                                                                                                                           |
| <i>catB7</i>       | 97.66 | 100 | NC_002516:779463-780102     | chromosome-encoded variant of the cat gene                                                                                                                                                                                                                                                                                                                                                    |
| <i>fosA</i>        | 99.51 | 100 | NC002516:1221691-1222099    | enzyme that confers resistance to fosfomycin in <i>Serratia marcescens</i> by breaking the epoxide ring of the molecule. It depends on the cofactors Manganese (II) and Potassium and uses Glutathione (GSH) as the nucleophilic molecule. In <i>P. aeruginosa</i> FosA catalyzes the conjugation of glutathione to carbon-1 of fosfomycin rendering it ineffective as an antibacterial drug. |
| <i>MexA</i>        | 99.31 | 100 | NC_002516:472024-473176     | membrane fusion protein of the MexAB-OprM multidrug efflux complex                                                                                                                                                                                                                                                                                                                            |
| <i>MexB</i>        | 99.01 | 100 | L11616:1570-4711            | inner membrane multidrug exporter of the efflux complex MexAB-OprM                                                                                                                                                                                                                                                                                                                            |

|             |       |       |                             |                                                                                                                                                                                                                     |
|-------------|-------|-------|-----------------------------|---------------------------------------------------------------------------------------------------------------------------------------------------------------------------------------------------------------------|
| <i>MexC</i> | 99.23 | 100   | U57969:295-1459             | membrane fusion protein of the MexCD-OprJ multidrug efflux complex                                                                                                                                                  |
| <i>MexD</i> | 97.73 | 99.94 | U57969:1486-4618            | multidrug inner membrane transporter of the MexCD-OprJ complex                                                                                                                                                      |
| <i>MexE</i> | 99.12 | 100   | NC_002516:2808743-2809988   | membrane fusion protein of the MexEF-OprN multidrug efflux complex                                                                                                                                                  |
| <i>MexF</i> | 99.28 | 100   | NC_002516:2810009-2813198   | multidrug inner membrane transporter of the MexEF-OprN complex. <i>mexF</i> corresponds to 2 loci in <i>P. aeruginosa</i> PAO1 ( <i>mexF/mexB</i> ) and 4 loci in <i>P. aeruginosa</i> LESB58 ( <i>mexD/mexB</i> ). |
| <i>mexG</i> | 99.78 | 100   | NC_002516:4705956-4706403   | membrane protein required for MexGHI-OpmD efflux activity                                                                                                                                                           |
| <i>mexH</i> | 99.1  | 100   | NC_002516:4706410-4707523   | membrane fusion protein of the efflux complex MexGHI-OpmD                                                                                                                                                           |
| <i>mexI</i> | 99.39 | 100   | NC_002516:4707535-4710625   | inner membrane transporter of the efflux complex MexGHI-OpmD                                                                                                                                                        |
| <i>mexJ</i> | 98.91 | 100   | NC_002516.2:4119270-4120374 | membrane fusion protein of the MexJK multidrug efflux protein                                                                                                                                                       |
| <i>mexK</i> | 98.7  | 100   | AE004091.2:4116188-4119266  | inner membrane resistance-nodulation-cell division (RND) transporter in the MexJK multidrug efflux protein                                                                                                          |
| <i>mexL</i> | 99.53 | 100   | AE004091.2:4120469-4121108  | a specific repressor of <i>mexJK</i> transcription and autoregulates its own expression                                                                                                                             |
| <i>mexM</i> | 99.31 | 100   | AB219523.1:22-1180          | membrane fusion protein of the MexMN-OprM multidrug efflux complex                                                                                                                                                  |
| <i>mexN</i> | 99.29 | 100   | AB219523.1:1176-4287        | inner membrane transporter of the MexMN-OprM multidrug efflux complex                                                                                                                                               |
| <i>mexP</i> | 98.88 | 100   | AB219524.1:23-1181          | membrane fusion protein of the MexPQ-OpmE multidrug efflux complex                                                                                                                                                  |
| <i>mexQ</i> | 98.89 | 100   | AB219524.1:1177-4339        | inner membrane transporter of the multidrug efflux pump MexPQ-OpmE                                                                                                                                                  |
| <i>mexV</i> | 98.67 | 100   | AE004091.2:4903466-4904597  | membrane fusion protein of the MexVW-OprM multidrug efflux complex                                                                                                                                                  |
| <i>mexW</i> | 99.48 | 100   | NC_002516.2:4904647-4907704 | RND-type membrane protein of the efflux complex MexVW-OprM                                                                                                                                                          |
| <i>mexX</i> | 97.71 | 100   | AB015853:146-1316           | membrane fusion protein of the MexXY-OprM multidrug efflux complex                                                                                                                                                  |
| <i>mexY</i> | 98.31 | 99.81 | AB015853:1331-4472          | RND-type membrane protein of the efflux complex MexXY-OprM                                                                                                                                                          |
| <i>MuxA</i> | 98.98 | 100   | NC_002516.2:2854011-2855292 | membrane fusion protein component of the efflux pump system MuxABC-OpmB in <i>P. aeruginosa</i>                                                                                                                     |

|                                    |       |       |                             |                                                                                                                                                                                                                                                                                                                                                                                                    |
|------------------------------------|-------|-------|-----------------------------|----------------------------------------------------------------------------------------------------------------------------------------------------------------------------------------------------------------------------------------------------------------------------------------------------------------------------------------------------------------------------------------------------|
| <i>MuxB</i>                        | 99.33 | 100   | NC_002516.2:2850883-2854015 | one of the two necessary RND components in the <i>P. aeruginosa</i> efflux pump system MuxABC-OpmB.                                                                                                                                                                                                                                                                                                |
| <i>MuxC</i>                        | 98.94 | 100   | NC_002516.2:2847776-2850887 | one of the two necessary RND components of the MuxABC-OpmB efflux pumps system in <i>P. aeruginosa</i>                                                                                                                                                                                                                                                                                             |
| <i>OpmB</i>                        | 99.13 | 100   | NC_002516.2:2846283-2847780 | outer membrane efflux protein in <i>P. aeruginosa</i> that shows functional cooperation with MuxABC to form the efflux pump system MuxABC-OpmB.                                                                                                                                                                                                                                                    |
| <i>opmD</i>                        | 98.57 | 99.93 | NC_002516:4710621-4712085   | outer membrane channel protein of the efflux complex MexGHI-OpmD.                                                                                                                                                                                                                                                                                                                                  |
| <i>opmE</i>                        | 99.25 | 100   | AB219524.1:4335-5811        | outer membrane factor protein that is part of the multidrug efflux pump MexPQ-OpmE.                                                                                                                                                                                                                                                                                                                |
| <i>OpmH</i>                        | 99.45 | 100   | NC_002516.2:5584101-5585550 | outer membrane efflux protein required for triclosan-specific efflux pump function.                                                                                                                                                                                                                                                                                                                |
| <i>OprJ</i>                        | 98.61 | 100   | U57969:4623-6063            | outer membrane channel component of the MexCD-OprJ multidrug efflux complex.                                                                                                                                                                                                                                                                                                                       |
| <i>OprM</i>                        | 99.18 | 100   | NC_002516:476333-477791     | outer membrane factor protein found in <i>P. aeruginosa</i> and <i>Burkholderia vietnamiensis</i> . It is part of the MexAB-OprM MexVW-OprM MexXY-OprM and the AmrAB-OprM complex.                                                                                                                                                                                                                 |
| <i>OprN</i>                        | 98.45 | 100   | NC_002516:2813194-2814613   | outer membrane channel component of the MexEF-OprN multidrug efflux complex.                                                                                                                                                                                                                                                                                                                       |
| <i>OXA-50</i>                      | 98.23 | 100   | AY306130:1-790              | beta-lactamase found in <i>P. aeruginosa</i> . It confers decreased susceptibility to ampicillin and ticarcillin and interestingly to moxalactam and meropenem in <i>P. aeruginosa</i> but not in <i>E. coli</i> . Also confers resistance to piperacillin-tazobactam and cephalotin.                                                                                                              |
| <i>PDC-5</i>                       | 99.41 | 100   | FJ666068:1-1195             | extended-spectrum beta-lactamase found in <i>P. aeruginosa</i>                                                                                                                                                                                                                                                                                                                                     |
| <i>PmpM</i>                        | 99.16 | 100   | NC_002516.2:1472547-1473981 | multidrug efflux pump belonging to the MATE family of <i>P. aeruginosa</i> . PmpM is an H <sup>+</sup> drug antiporter and is the first reported case of an H <sup>+</sup> coupled efflux pump in the MATE family. PmpM confers resistance to fluoroquinolones fradiomycin benzalkonium chloride chlorhexidine gluconate ethidium bromide tetraphenylphosphonium chloride (TPPCl) and rhodamine 6G |
| <i>Pseudomonas_aeruginosa_CpxR</i> | 99.56 | 100   | LT673656.1:1884345-1885023  | directly involved in activation of expression of RND efflux pump MexAB-OprM in <i>P. aeruginosa</i> . CpxR is required to enhance mexAB-oprM expression and drug resistance in the absence of repressor MexR.                                                                                                                                                                                      |

|                                    |       |       |                             |                                                                                                                                                                                                                                                                                                  |
|------------------------------------|-------|-------|-----------------------------|--------------------------------------------------------------------------------------------------------------------------------------------------------------------------------------------------------------------------------------------------------------------------------------------------|
| <i>Pseudomonas_aeruginosa_emrE</i> | 99.1  | 100   | NC_002516.2:1-334           | a small multidrug transporter that functions as a homodimer and that couples the efflux of small polyaromatic cations from the cell with the import of protons down an electrochemical gradient. Confers resistance to tetraphenylphosphonium methyl viologen gentamicin kanamycin and neomycin. |
| <i>Pseudomonas_aeruginosa_soxR</i> | 98.94 | 100   | NC_002516.2:2503425-2503896 | SoxR is a redox-sensitive transcriptional activator that induces expression of a small regulon that includes the RND efflux pump-encoding operon mexGHI-opmD. SoxR was shown to be activated by pyocyanin.                                                                                       |
| <i>TriA</i>                        | 99.22 | 100   | NC_002516.2:177307-178459   | membrane protein that is fused to TriB and both are required for the triclosan efflux pump function of TriABC-OpmH in <i>P. aeruginosa</i>                                                                                                                                                       |
| <i>TriB</i>                        | 99.25 | 100   | NC_002516.2:178455-179526   | membrane protein that is fused to TriA and both are required for the triclosan efflux pump function of TriABC-OpmH in <i>P. aeruginosa</i>                                                                                                                                                       |
| <i>TriC</i>                        | 99.18 | 100   | NC_002516.2:179522-182570   | resistance nodulation cell division (RND) transporter that is a part of TriABC-OpmH a triclosan-specific efflux protein.                                                                                                                                                                         |
| <i>AxyY</i>                        | 78.44 | 97.74 | AFRQ01000061.1:23987-27125  | periplasmic adaptor protein of the AxyXY-OprZ efflux pump system in <i>Achromobacter spp.</i>                                                                                                                                                                                                    |

Table S8 Virulence genes detected in *Escherichia coli* Mylor Harbour.

| gene name   | nt identity (%) | coverage (%) | acc. nr.  | description                                                           |
|-------------|-----------------|--------------|-----------|-----------------------------------------------------------------------|
| <i>aslA</i> | 98.25           | 100          | AAG10151  | putative arylsulfatase                                                |
| <i>chuA</i> | 99.74           | 100          | NP_756170 | Outer membrane heme/hemoglobin receptor                               |
| <i>chuS</i> | 99.51           | 100          | NP_756169 | heme oxygenase                                                        |
| <i>chuT</i> | 99.5            | 100          | NP_756175 | periplasmic heme-binding protein                                      |
| <i>chuU</i> | 99.09           | 100          | NP_756179 | heme permease protein                                                 |
| <i>chuV</i> | 98.38           | 100          | NP_756180 | ATP-binding hydrophilic protein                                       |
| <i>chuW</i> | 99.33           | 100          | NP_756176 | Putative oxygen independent coproporphyrinogen III oxidase            |
| <i>chuX</i> | 100             | 100          | NP_756177 | putative heme-binding protein                                         |
| <i>chuY</i> | 100             | 100          | NP_756178 | ChuY                                                                  |
| <i>entA</i> | 98.26           | 100          | NP_752614 | 23-dihydro-23-dihydroxybenzoate dehydrogenase [Enterobactin (VF0228)] |
| <i>entB</i> | 99.77           | 100          | NP_752613 | isochorismatase [Enterobactin (VF0228)]                               |
| <i>entC</i> | 98.57           | 100          | NP_752611 | isochorismate synthase 1 [Enterobactin (VF0228)]                      |



|                  |       |       |              |                                                                                                                |
|------------------|-------|-------|--------------|----------------------------------------------------------------------------------------------------------------|
| <i>entD</i>      | 99.87 | 100   | NP_752599    | phosphopantetheinyl transferase component of enterobactin synthase multienzyme complex [Enterobactin (VF0228)] |
| <i>entE</i>      | 98.39 | 100   | NP_752612    | 23-dihydroxybenzoate-AMP ligase component of enterobactin synthase multienzyme complex [Enterobactin (VF0228)] |
| <i>entF</i>      | 98.7  | 99.28 | NP_752604    | enterobactin synthase multienzyme complex component ATP-dependent [Enterobactin (VF0228)]                      |
| <i>entS</i>      | 98.32 | 100   | NP_752609    | enterobactin exporter iron-regulated [enterobactin (IA019)]                                                    |
| <i>fdeC</i>      | 98.28 | 100   | YP_002390132 | adhesin                                                                                                        |
| <i>fepA</i>      | 99.06 | 100   | NP_752600    | ferrienterobactin outer membrane transporter [Enterobactin (VF0228)]                                           |
| <i>fepB</i>      | 99.48 | 100   | NP_752610    | ferrienterobactin ABC transporter periplasmic binding protein [Enterobactin (VF0228)]                          |
| <i>fepC</i>      | 98.9  | 100   | NP_752606    | ferrienterobactin ABC transporter ATPase [Enterobactin (VF0228)]                                               |
| <i>fepD</i>      | 98.92 | 100   | NP_752608    | ferrienterobactin ABC transporter permease [Enterobactin (VF0228)]                                             |
| <i>fepG</i>      | 98.49 | 100   | NP_752607    | iron-enterobactin ABC transporter permease [Enterobactin (VF0228)]                                             |
| <i>fes</i>       | 99.58 | 100   | NP_752602    | enterobactin/ferric enterobactin esterase [Enterobactin (IA019)]                                               |
| <i>fimA</i>      | 92.08 | 100   | NP_757241    | Type-1 fimbrial protein A chain precursor                                                                      |
| <i>fimB</i>      | 99.83 | 100   | NP_757239    | Type 1 fimbriae Regulatory protein                                                                             |
| <i>fimC</i>      | 99.04 | 100   | NP_757243    | Chaperone protein fimC precursor                                                                               |
| <i>fimD</i>      | 99.01 | 100   | NP_757244    | Outer membrane usher protein fimD precursor                                                                    |
| <i>fimE</i>      | 100   | 100   | NP_757240    | Type 1 fimbriae Regulatory protein                                                                             |
| <i>fimF</i>      | 99.81 | 100   | NP_757245    | FimF protein precursor                                                                                         |
| <i>fimG</i>      | 98.81 | 100   | NP_757247    | FimG protein precursor                                                                                         |
| <i>fimH</i>      | 98.9  | 100   | NP_757248    | FimH protein precursor                                                                                         |
| <i>fimI</i>      | 99.44 | 100   | NP_757242    | Fimbrin-like protein fimI precursor                                                                            |
| <i>fyuA</i>      | 99.8  | 100   | NP_405467    | pesticin/yersiniabactin receptor protein                                                                       |
| <i>gspM</i>      | 92.62 | 92.91 | YP_404609    | general secretion pathway protein M                                                                            |
| <i>ibeA</i>      | 98.47 | 99.93 | AAF98391     | invasion protein                                                                                               |
| <i>irp1</i>      | 99.69 | 100   | NP_405471    | yersiniabactin biosynthetic protein                                                                            |
| <i>irp2</i>      | 99.44 | 100   | NP_405472    | yersiniabactin biosynthetic protein                                                                            |
| <i>ompA</i>      | 99.81 | 100   | AAF37887     | outer membrane protein A                                                                                       |
| <i>set1A</i>     | 94.38 | 99.44 | YP_006098866 | toxin subunit                                                                                                  |
| <i>set1B</i>     | 98.39 | 100   | YP_006098865 | toxin subunit                                                                                                  |
| <i>vat</i>       | 99.9  | 100   | NP_752330    | Haemoglobin protease                                                                                           |
| <i>yagV/ecpE</i> | 98.14 | 99.74 | NP_286006    | <i>E. coli</i> common pilus chaperone                                                                          |
| <i>yagW/ecpD</i> | 99.09 | 100   | NP_286007    | polymerized tip adhesin of ECP fibers                                                                          |
| <i>yagX/ecpC</i> | 97.78 | 100   | NP_286008    | <i>E. coli</i> common pilus usher                                                                              |
| <i>yagY/ecpB</i> | 97.76 | 100   | NP_286009    | <i>E. coli</i> common pilus chaperone                                                                          |

|                  |       |       |              |                                                        |
|------------------|-------|-------|--------------|--------------------------------------------------------|
| <i>yagZ/ecpA</i> | 98.3  | 100   | NP_286010    | <i>E. coli</i> common pilus structural subunit         |
| <i>ybtA</i>      | 99.58 | 100   | NP_405473    | transcriptional regulator                              |
| <i>ybtE</i>      | 99.94 | 100   | NP_405468    | yersiniabactin siderophore biosynthetic protein        |
| <i>ybtP</i>      | 99.61 | 100   | NP_405474    | lipoprotein inner membrane ABC-transporter             |
| <i>ybtQ</i>      | 99.72 | 100   | NP_405475    | inner membrane ABC-transporter                         |
| <i>ybtS</i>      | 99.69 | 100   | NP_405477    | salicylate synthase Irp9                               |
| <i>ybtT</i>      | 99.75 | 100   | NP_405469    | yersiniabactin biosynthetic protein                    |
| <i>ybtU</i>      | 99.73 | 100   | NP_405470    | yersiniabactin biosynthetic protein                    |
| <i>ybtX</i>      | 99.69 | 100   | NP_405476    | putative signal transducer                             |
| <i>ykgK/ecpR</i> | 99.32 | 100   | NP_286011    | regulator protein                                      |
| <i>cheW</i>      | 75.11 | 90.36 | YP_001006779 | purine-binding chemotaxis protein                      |
| <i>cheY</i>      | 77.06 | 99.49 | YP_001006774 | chemotaxis regulatory protein                          |
| <i>csgB</i>      | 83.59 | 99.78 | NP_460114    | minor curlin subunit precursor curli nucleator protein |
| <i>csgD</i>      | 81.41 | 100   | NP_460113    | DNA-binding transcriptional regulator                  |
| <i>csgE</i>      | 79.29 | 98.48 | NP_460112    | curli production assembly/transport protein            |
| <i>csgF</i>      | 81    | 99.04 | NP_460111    | curli production assembly/transport protein            |
| <i>csgG</i>      | 83.45 | 100   | NP_460110    | curli production assembly/transport protein            |
| <i>flgG</i>      | 75.81 | 98.93 | YP_001006759 | flagellar basal-body rod protein                       |
| <i>flgH</i>      | 78.99 | 80.7  | YP_001006758 | flagellar L-ring protein precursor                     |
| <i>flhA</i>      | 75.01 | 99.04 | YP_001006770 | flagellar biosynthesis protein                         |
| <i>flhC</i>      | 75.05 | 95.19 | YP_001006783 | flagellar biosynthesis transcription activator         |
| <i>fliG</i>      | 78.54 | 99.5  | YP_001006742 | flagellar motor switch protein G                       |
| <i>fliI</i>      | 75.74 | 92.79 | YP_001006744 | flagellum-specific ATP synthase                        |
| <i>fliM</i>      | 76.33 | 99.5  | YP_001006748 | flagellar motor switch protein                         |
| <i>fliP</i>      | 77.43 | 98.4  | YP_001006751 | flagellar biosynthetic protein                         |

Table S9 Antibiotic resistance genes detected in *Escherichia coli* Mylor Harbour.

| gene name   | nt identity (%) | coverage (%) | acc. nr.                  | description                                                                                                                                                                                                                                                        |
|-------------|-----------------|--------------|---------------------------|--------------------------------------------------------------------------------------------------------------------------------------------------------------------------------------------------------------------------------------------------------------------|
| <i>acrB</i> | 98.83           | 100          | NC_000913.3:481254-484404 | Protein subunit of AcrA-AcrB-TolC multidrug efflux complex. <i>AcrB</i> functions as a heterotrimer which forms the inner membrane component and is primarily responsible for substrate recognition and energy transduction by acting as a drug/proton antiporter. |
| <i>acrD</i> | 98.56           | 100          | NC_007779:2586251-2589365 | aminoglycoside efflux pump expressed in <i>E. coli</i> . Its expression can be induced by indole and is regulated by <i>baeRS</i> and <i>cpxABR</i> .                                                                                                              |
| <i>acrE</i> | 98.79           | 100          | U00096:3413864-3415022    | membrane fusion protein similar to AcrA.                                                                                                                                                                                                                           |

|                               |       |       |                             |                                                                                                                                                                                                    |
|-------------------------------|-------|-------|-----------------------------|----------------------------------------------------------------------------------------------------------------------------------------------------------------------------------------------------|
| <i>acrF</i>                   | 96.59 | 100   | U00096:3415033-3418138      | inner membrane transporter similar to AcrB.                                                                                                                                                        |
| <i>acrS</i>                   | 98.34 | 100   | U00096:3412803-3413466      | repressor of the AcrAB efflux complex and is associated with the expression of AcrEF. AcrS is believed to regulate a switch between AcrAB and AcrEF efflux.                                        |
| <i>bacA</i>                   | 98.17 | 99.76 | U00096:3203310-3204132      | gene that recycles undecaprenyl pyrophosphate during cell wall biosynthesis which confers resistance to bacitracin                                                                                 |
| <i>baeR</i>                   | 97.23 | 99.72 | NC_007779:2166413-2167136   | response regulator that promotes the expression of MdtABC and AcrD efflux complexes.                                                                                                               |
| <i>baeS</i>                   | 90.46 | 100   | AP009048:2165013-2166417    | sensor kinase in the BaeSR regulatory system. While it phosphorylates BaeR to increase its activity BaeS is not necessary for overexpressed BaeR to confer resistance.                             |
| <i>cpxA</i>                   | 98.47 | 99.56 | NC_002695:4903562-4904936   | a membrane-localized sensor kinase that is activated by envelope stress. It starts a kinase cascade that activates CpxR which promotes efflux complex expression.                                  |
| <i>CRP</i>                    | 99.05 | 100   | AP009048:4153664-4154297    | global regulator that represses MdtEF multidrug efflux pump expression.                                                                                                                            |
| <i>emrA</i>                   | 98.13 | 100   | AP009048:2810083-2811256    | membrane fusion protein providing an efflux pathway with EmrB and TolC between the inner and outer membranes of <i>E. coli</i> .                                                                   |
| <i>emrB</i>                   | 97.99 | 100   | U00096:2812616-2814155      | translocase in the <i>emrB</i> -TolC efflux protein in <i>E. coli</i> . It recognizes substrates including carbonyl cyanide m-chlorophenylhydrazone (CCCP) nalidixic acid and thioactomycin.       |
| <i>emrD</i>                   | 97.82 | 100   | GG749185.1:116813-118004    | multidrug transporter from the Major Facilitator Superfamily (MFS) primarily found in <i>E. coli</i> . EmrD couples efflux of amphipathic compounds with proton import across the plasma membrane. |
| <i>emrK</i>                   | 97.64 | 100   | D78168:537-1593             | membrane fusion protein that is a homolog of EmrA. Together with the inner membrane transporter EmrY and the outer membrane channel TolC it mediates multidrug efflux.                             |
| <i>emrR</i>                   | 99.06 | 100   | NC_000913.3:2810770-2811301 | negative regulator for the EmrAB-TolC multidrug efflux pump in <i>E. coli</i> . Mutations lead to EmrAB-TolC overexpression.                                                                       |
| <i>emrY</i>                   | 97.66 | 100   | D78168:1592-3131            | multidrug transport that moves substrates across the inner membrane of the Gram-negative <i>E. coli</i> . It is a homolog of <i>emrB</i> .                                                         |
| <i>Escherichia_coli_acrA</i>  | 99.08 | 100   | NC_000913.3:484426-485620   | subunit of the AcrAB-TolC multidrug efflux system that in <i>E. coli</i> .                                                                                                                         |
| <i>Escherichia_coli_amp C</i> | 98.06 | 100   | NC_000913.3:4377811-4378945 | class C ampC beta-lactamase (cephalosporinase) enzyme described in <i>E. coli</i> shown clinically to confer resistance to penicillin-like and cephalosporin-class antibiotics.                    |
| <i>Escherichia_coli_mdfA</i>  | 96.35 | 100   | JQ394987:1-1234             | Multidrug efflux pump in <i>E. coli</i> . This multidrug efflux system was originally identified as the Cmr/CmlA chloramphenicol exporter.                                                         |

|             |       |       |                            |                                                                                                                                                                                                                                                                                                                                                                                                                                                   |
|-------------|-------|-------|----------------------------|---------------------------------------------------------------------------------------------------------------------------------------------------------------------------------------------------------------------------------------------------------------------------------------------------------------------------------------------------------------------------------------------------------------------------------------------------|
| <i>evgA</i> | 99.03 | 100   | NC_002695:3211892-3212507  | when phosphorylated is a positive regulator for efflux protein complexes emrKY and mdtEF. While usually phosphorylated in a EvgS dependent manner it can be phosphorylated in the absence of EvgS when overexpressed.                                                                                                                                                                                                                             |
| <i>evgS</i> | 96.19 | 100   | U00096:2484374-2487968     | sensor protein that phosphorylates the regulatory protein EvgA. <i>evgS</i> corresponds to 1 locus in <i>P. aeruginosa</i> PAO1 and 1 locus in <i>P. aeruginosa</i> LESB58.                                                                                                                                                                                                                                                                       |
| <i>gadW</i> | 99.86 | 100   | CP015085.1:2551712-2552441 | AraC-family regulator that promotes mdtEF expression to confer multidrug resistance. GadW inhibits GadX-dependent activation. GadW clearly represses <i>gadX</i> and in situations where GadX is missing activates <i>gadA</i> and <i>gadBC</i> .                                                                                                                                                                                                 |
| <i>gadX</i> | 93.7  | 100   | NC_007779:3974605-3975430  | AraC-family regulator that promotes mdtEF expression to confer multidrug resistance.                                                                                                                                                                                                                                                                                                                                                              |
| <i>H-NS</i> | 99.28 | 100   | NC_002695:1737554-1737968  | histone-like protein involved in global gene regulation in Gram-negative bacteria. It is a repressor of the membrane fusion protein genes <i>acrE</i> <i>mdtE</i> and <i>emrK</i> as well as nearby genes of many RND-type multidrug exporters.                                                                                                                                                                                                   |
| <i>kdpE</i> | 95.84 | 99.26 | NC_000913.3:721056-721734  | transcriptional activator that is part of the two-component system KdpD/KdpE that is studied for its regulatory role in potassium transport and has been identified as an adaptive regulator involved in the virulence and intracellular survival of pathogenic bacteria. <i>kdpE</i> regulates a range of virulence loci through direct promoter binding.                                                                                        |
| <i>marA</i> | 98.18 | 100   | NC_007779:1621288-1621672  | In the presence of antibiotic stress <i>E. coli</i> overexpresses the global activator protein MarA which besides inducing MDR efflux pump AcrAB also down-regulates synthesis of the porin OmpF.                                                                                                                                                                                                                                                 |
| <i>mdtA</i> | 95.84 | 100   | U00096:2154016-2155264     | membrane fusion protein of the multidrug efflux complex mdtABC.                                                                                                                                                                                                                                                                                                                                                                                   |
| <i>mdtB</i> | 95.81 | 100   | U00096:2155263-2158386     | transporter that forms a heteromultimer complex with MdtC to form a multidrug transporter. MdtBC is part of the MdtABC-ToIC efflux complex.                                                                                                                                                                                                                                                                                                       |
| <i>mdtC</i> | 93.86 | 100   | U00096:2158386-2161464     | transporter that forms a heteromultimer complex with MdtB to form a multidrug transporter. MdtBC is part of the MdtABC-ToIC efflux complex. In the absence of MdtB MdtC can form a homomultimer complex that results in a functioning efflux complex with a narrower drug specificity. <i>mdtC</i> corresponds to 3 loci in <i>Pseudomonas aeruginosa</i> PAO1 (gene name: <i>muxC/muxB</i> ) and 3 loci in <i>Pseudomonas aeruginosa</i> LESB58. |
| <i>mdtE</i> | 98.53 | 100   | AP009048:3980026-3981184   | membrane fusion protein of the MdtEF multidrug efflux complex. It shares 70% sequence similarity with AcrA.                                                                                                                                                                                                                                                                                                                                       |
| <i>mdtF</i> | 97.24 | 100   | U00096:3660414-3663528     | multidrug inner membrane transporter for the MdtEF-ToIC efflux complex.                                                                                                                                                                                                                                                                                                                                                                           |

|             |       |     |                             |                                                                                                                                                                                                                                                                                                                                                                                                                                                                                            |
|-------------|-------|-----|-----------------------------|--------------------------------------------------------------------------------------------------------------------------------------------------------------------------------------------------------------------------------------------------------------------------------------------------------------------------------------------------------------------------------------------------------------------------------------------------------------------------------------------|
| <i>mdtG</i> | 98.37 | 100 | NC_007779:1115841-1117068   | also named YceE, appears to be a member of the major facilitator superfamily of transporters and it has been reported when overexpressed to increase fosfomycin and deoxycholate resistances. <i>mdtG</i> is a member of the <i>marA</i> - <i>soxS</i> - <i>rob</i> regulon.                                                                                                                                                                                                               |
| <i>mdtH</i> | 98.1  | 100 | U00096:1124118-1125327      | Multidrug resistance protein                                                                                                                                                                                                                                                                                                                                                                                                                                                               |
| <i>mdtN</i> | 95.83 | 100 | AP009048:4306557-4307589    | Multidrug resistance efflux pump. Could be involved in resistance to puromycin acriflavine and tetraphenylarsonium chloride.                                                                                                                                                                                                                                                                                                                                                               |
| <i>mdtO</i> | 97.17 | 100 | AP009048:4304506-4306558    | Multidrug resistance efflux pump. Could be involved in resistance to puromycin acriflavine and tetraphenylarsonium chloride                                                                                                                                                                                                                                                                                                                                                                |
| <i>mdtP</i> | 97.48 | 100 | AP009048:4303043-4304510    | Multidrug resistance efflux pump. Could be involved in resistance to puromycin acriflavine and tetraphenylarsonium chloride                                                                                                                                                                                                                                                                                                                                                                |
| <i>msbA</i> | 97.77 | 100 | NC_000913.3:966621-968370   | multidrug resistance transporter homolog from <i>E. coli</i> and belongs to a superfamily of transporters that contain an adenosine triphosphate (ATP) binding cassette (ABC) which is also called a nucleotide-binding domain (NBD). <i>MsbA</i> is a member of the MDR-ABC transporter group by sequence homology. <i>MsbA</i> transports lipid A a major component of the bacterial outer cell membrane and is the only bacterial ABC transporter that is essential for cell viability. |
| <i>patA</i> | 97.03 | 100 | NC_000913.3:3219494-3220874 | <i>PatA</i> is an ABC transporter of <i>Streptococcus pneumoniae</i> that interacts with <i>PatB</i> to confer fluoroquinolone resistance.                                                                                                                                                                                                                                                                                                                                                 |
| <i>PmrC</i> | 91.12 | 100 | AP009048:4338625-4340269    | mediates the modification of Lipid A by the addition of 4-amino-4-deoxy-L-arabinose (L-Ara4N) and phosphoethanolamine resulting in a less negative cell membrane and decreased binding of polymyxin B.                                                                                                                                                                                                                                                                                     |
| <i>pmrE</i> | 94.09 | 100 | U00096:2098447-2099614      | required for the synthesis and transfer of 4-amino-4-deoxy-L-arabinose (Ara4N) to Lipid A which allows gram-negative bacteria to resist the antimicrobial activity of cationic antimicrobial peptides and antibiotics such as polymyxin                                                                                                                                                                                                                                                    |
| <i>pmrF</i> | 97.63 | 100 | U00096:2367071-2368040      | required for the synthesis and transfer of 4-amino-4-deoxy-L-arabinose (Ara4N) to Lipid A which allows gram-negative bacteria to resist the antimicrobial activity of cationic antimicrobial peptides and antibiotics such as polymyxin. <i>pmrF</i> corresponds to 1 locus in <i>Pseudomonas aeruginosa</i> PAO1 and 1 locus in <i>Pseudomonas aeruginosa</i> LESB58.                                                                                                                     |
| <i>tolC</i> | 98.39 | 100 | FJ768952:1-1489             | <i>TolC</i> is a protein subunit of many multidrug efflux complexes in Gram negative bacteria. It is an outer membrane efflux protein and is constitutively open. Regulation of efflux activity is often at its periplasmic entrance by other components of the efflux complex.                                                                                                                                                                                                            |

|             |       |       |                            |                                                                                                                                                                                                                                                                                                                                  |
|-------------|-------|-------|----------------------------|----------------------------------------------------------------------------------------------------------------------------------------------------------------------------------------------------------------------------------------------------------------------------------------------------------------------------------|
| <i>yojl</i> | 97.57 | 99.94 | NC_000913.3:1-1645         | mediates resistance to the peptide antibiotic microcin J25 when it is expressed from a multicopy vector. Yojl is capable of pumping out microcin molecules. The outer membrane protein TolC in addition to Yojl is required for export of microcin J25 out of the cell. Microcin J25 is thus the first known substrate for Yojl. |
| <i>mdtK</i> | 75.27 | 98.74 | CP014358.1:2161326-2162751 | multidrug and toxic compound extrusions (MATE) transporter conferring resistance to norfloxacin doxorubicin and acriflavine.                                                                                                                                                                                                     |
| <i>vgaC</i> | 83.55 | 100   | KU302801:102200-102431     | efflux protein expressed in staphylococci that confers resistance to streptogramin A antibiotics and related compounds. It is associated with plasmid DNA.                                                                                                                                                                       |

## Supplemental References

Alikhan N-F, Petty NK, Zakour NLB, Beatson SA (2011). BLAST Ring Image Generator (BRIG): simple prokaryote genome comparisons. *BMC Genomics* **12**: 402.

Alikhan N-F, Zhou Z, Sergeant MJ, Achtman M (2018). A genomic overview of the population structure of Salmonella. *Plos Genet* **14**: e1007261.

Altschul SF, Gish W, Miller W, Myers EW, Lipman DJ (1990). Basic local alignment search tool. *J Mol Biol* **215**: 403-410.

Bankevich A, Nurk S, Antipov D, Gurevich AA, Dvorkin M, Kulikov AS *et al* (2012). SPAdes: a new genome assembly algorithm and its applications to single-cell sequencing. *J Comput Biol* **19**: 455-477.

Bolger AM, Lohse M, Usadel B (2014). Trimmomatic: a flexible trimmer for Illumina sequence data. *Bioinformatics* **30**: 2114-2120.

Castillo D, Alvisé PD, Xu R, Zhang F, Middelboe M, Gram L (2017). Comparative Genome Analyses of *Vibrio anguillarum* Strains Reveal a Link with Pathogenicity Traits. *Msystems* **2**: e00001-00017.

Chen L, Zheng D, Liu B, Yang J, Jin Q (2015). VFDB 2016: hierarchical and refined dataset for big data analysis—10 years on. *Nucleic Acids Res* **44**: D694-D697.

Darling AE, Mau B, Perna NT (2010). progressiveMauve: multiple genome alignment with gene gain, loss and rearrangement. *Plos One* **5**: e11147.

Jolley KA, Maiden MC (2010). BIGSdb: scalable analysis of bacterial genome variation at the population level. *BMC Bioinformatics* **11**: 595.

Larsen MV, Cosentino S, Rasmussen S, Friis C, Hasman H, Marvig RL *et al* (2012). Multilocus sequence typing of total-genome-sequenced bacteria. *J Clin Microbiol* **50**: 1355-1361.

McArthur AG, Waglechner N, Nizam F, Yan A, Azad MA, Baylay AJ *et al* (2013). The comprehensive antibiotic resistance database. *Antimicrob Agents Chemother* **57**: 3348-3357.

Page AJ, Cummins CA, Hunt M, Wong VK, Reuter S, Holden MT *et al* (2015). Roary: rapid large-scale prokaryote pan genome analysis. *Bioinformatics* **31**: 3691-3693.

Seemann T (2014). Prokka: rapid prokaryotic genome annotation. *Bioinformatics*: btu153.

Wood DE, Salzberg SL (2014). Kraken: ultrafast metagenomic sequence classification using exact alignments. *Genome Biol* **15**: R46.
